# Supplementary material
Source: publisher figshare collection journal article supplement (https://karger.figshare.com/ndownloader/files/37466386)
Supplement: Supplementary file 1 [file 37466386]

Supplementary Table 2. Demographic, clinical data and test results of patients with confirmed HRs to foods

| Patients | Age | Sex | Culprit Food | Initial Reaction Type | Severity Of Initial Reaction | Spt With Extracts | Spt With Fresh Foods | Ofct Result | Symptoms During Provocation Test | Spt With Inhalant Allergen |
| --- | --- | --- | --- | --- | --- | --- | --- | --- | --- | --- |
| GrA 1 | **37** | **F** | Hen’s egg white | Urticaria | Grade 2 | + | + | + | Generalized urticaria | Tree mix +, Timothy grass +, Wormwood + |
| GrA 2 | **56** | **F** | Chili pepper | Rhinitis, Dypsnea-OAS | Grade 2 | NP | + | + | Rhinitis, Dyspnea, Itching in oral cavity | Plantain +  Alternaria Alternata + |
| GrA 3 | **33** | **F** | Ginger | Urticaria-Angioedema | Grade 2 | NP | + | + | Angioedema and generalized urticaria | - |
| GrA 4 | **47** | **F** | Wheat | Urticaria | Grade 1 | + | + | + | Localized urticaria | Birch +, Plantain +, House dust mite + |
|  |  |  | Banana | OAS | Grade 1 | NP | + | + | Itching and blisters in oral cavity |
|  |  |  | Orange | OAS | Grade 1 | NP | + | + | Itching and blisters in oral cavity |
| GrA 5 | **64** | **M** | Chili pepper | OAS-angioedema | Grade 2 | NP | + | + | Itching, blisters in oral cavity and angioedema | Weed mix (Plantain, Dandelion, Wormwood, Nettle) + |
| GrA 6 | **24** | **F** | Beef | Anaphylaxis | Grade 3 | NP | + | NP | NP | House dust mite +, Birch + |
| GrA 7 | **22** | **M** | Tomato | Urticaria | Grade 2 | + | + | + | Generalized urticaria | House dust mite+ |
| GrA 8 | **56** | **F** | Peanut | Urticaria | Grade 2 | + | + | + | Generalized urticaria | Olea +, Ash +, Wormwood +, Grass mix + |
| GrA 9 | **29** | **F** | Tomato | Urticaria | Grade 2 | - | + | + | Generalized urticaria | House dust mite + |
| GrA 10 | **56** | **M** | Black pepper | OAS | Grade 1 | NP | + | + | Itching and blisters in oral cavity, | Grass mix +, Plantain + |
|  |  |  | Chili pepper | OAS | Grade 1 | NP | + | + | Itching in oral cavity and angioedema on lips |
| GrA 11 | **53** | **F** | Chili pepper | Urticaria | Grade 2 | NP | + | + | Generalized urticaria |  |
| GrA 12 | **60** | **M** | Cumin | Itching, Diarrhea, Abdominal pain | Grade 2 | NP | + | + | Itching,diarrhea,  Abdominal pain |  |
| GrA 13 | **38** | **M** | Tomato | Urticaria-Angioedema | Grade 2 | - | + | + | Generalized urticaria, Angioedema | House dust mite+, Grass mix+, Grass/rye mix+, Weed mix+, Wormwood+ |
| GrA 14 | **55** | **F** | Strawberry | OAS, | Grade 1 | - | + | + | Itching and blister in oral cavity, mild angioedema on lips | Birch+, Wall pelitory+, Grass mix+, Grass/rye mix+, Weed mix+ |
|  |  |  | Olive | Urticaria | Grade 1 | NP | - | + | Localized urticaria |  |
| GrA 15 | **44** | **F** | Hazelnut | OAS | Grade 1 | + | + | + | Itching and blister in oral cavity | Birch+, Weed mix + |
|  |  |  | Strawberry | OAS | Grade 1 | + | + | + | Itching and blister in oral cavity |
| GrA 16 | **20** | **F** | Mushroom | Angioedema, Dyspnea | Grade 2 | NP | - | + | Angioedema, uvula edema, dyspnea | Wall pellitory+, House dust mite+, Cat epithelium+, Poplar + |
| GrA 17 | **23** | **F** | Chili peppers | Urticaria | Grade 2 | NP | + | + | Generalized urticaria | - |
| GrA 18 | **35** | **F** | Chili peppers | OAS/Urticaria | Grade 1 | NP | + | + | Oral itching, Blister in oral cavity, Urticaria | House dust mite+, Grass mix+, Grass/rye mix+, Weed mix+ |
| GrA 19 | **40** | **F** | Pepper | OAS | Grade 2 | NP | + | + | Angıoedema on lips, Blisters in oral cavity, Oral itching | Poplar+, Plantain+, Grass mix+, Tree mix+ |
| GrA 20 | **57** | **M** | Garlic | Urticaria | Grade 2 | NP | + | + | Generalized urticaria and angioedema | - |
| GrB 1 | **35** | **M** | Wheat | Wheat dependent Exercise induced anaphylaxis | Grade 3 | + | + | NP | NP | Grass mix + |
| GrB 2 | **29** | **F** | Beef | Urticaria | Grade 2 | NP | NP | + | Generalized urticaria | - |
| GrB 3 | **42** | **M** | Hen’s egg yolk | Urticaria | Grade 2 | + | + | + | Generalized urticaria | - |
| GrB 4 | **29** | **F** | Hen’s egg white | Urticaria | Grade 2 | + | + | + | Generalized urticaria | - |
|  |  |  | Walnut | Urticaria | Grade 2 | - | - | + | Generalized urticaria |

GrA: Group A, GrB: Group B, NP: not performed, +: positive result, -: negative result, F: female, M: male, SPT: skin prick test, OFCT; open food challenge test, OAS: oral allergy syndrome
